# Supplementary material
Source: MDPI journal article supplement (https://www.mdpi.com/2071-1050/16/2/622)
Supplement: s1 [file s1 › sustainability-2719157-supplementary.pdf]

## Supplementary material

### Fast start-up of one-stage partial nitritation/anammox by reducing oxygen concentration without inoculum addition

Weronika Borowska<sup>1</sup>, Monika Zubrowska-Sudol<sup>1,\*</sup> and Nina Doskocz<sup>2</sup>

<sup>1</sup>Department of Water Supply and Wastewater Treatment, Faculty of Building Services, Hydro and Environmental Engineering, Warsaw University of Technology, Nowowiejska 20, 00-653 Warsaw, Poland

<sup>2</sup>Department of Biology, Faculty of Building Services, Hydro and Environmental Engineering, Warsaw University of Technology, Nowowiejska 20, 00-653 Warsaw, Poland

\* Corresponding author: monika.sudol@pw.edu.pl

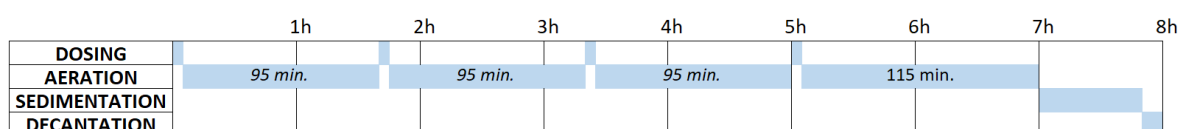

Figure S1. The MBSBBR complete cycle duration.

(a) AUR

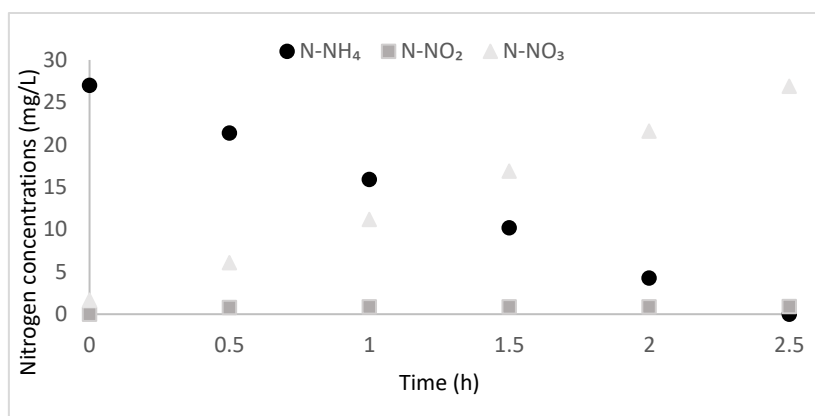

(b) NUR

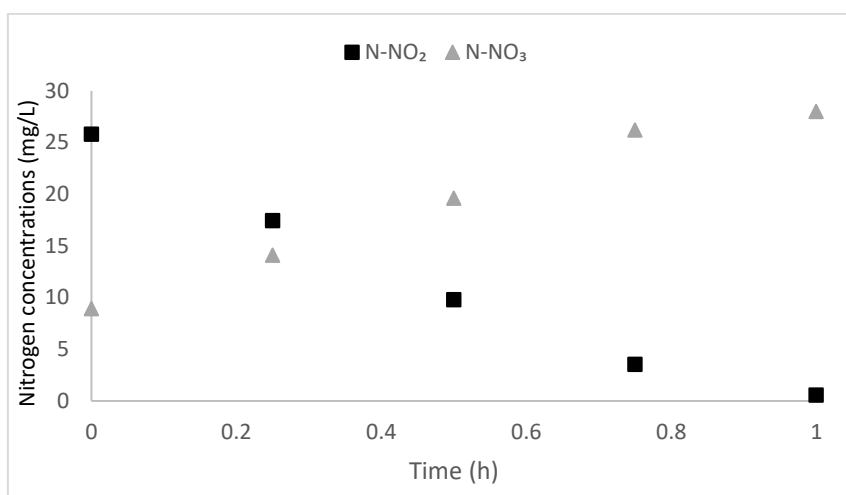

Figure S2. Batch test results during Stage I: (a) AUR, (b) NUR.

(a) AUR

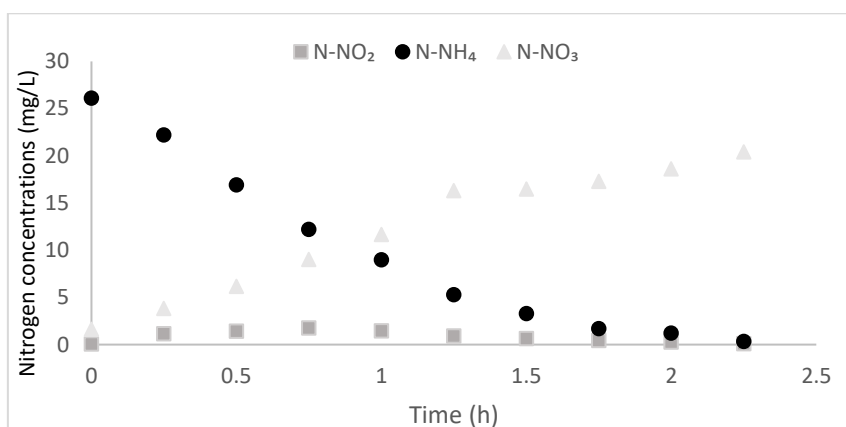

(b) NUR

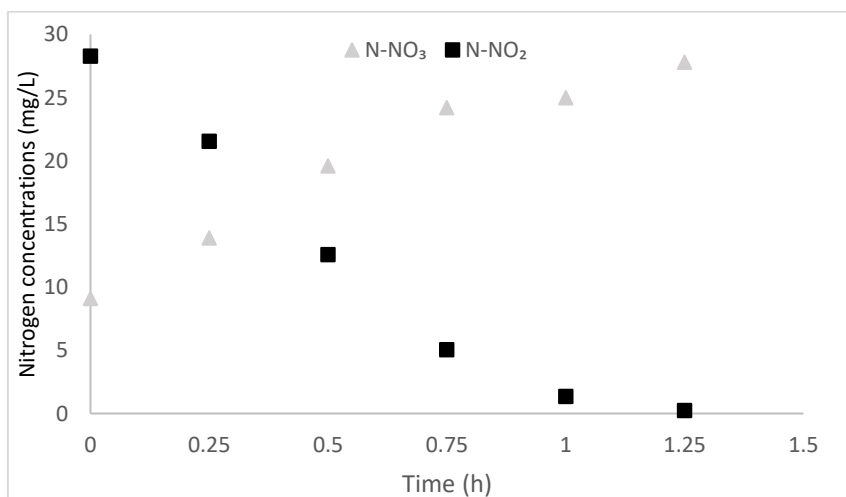

(c) SAA

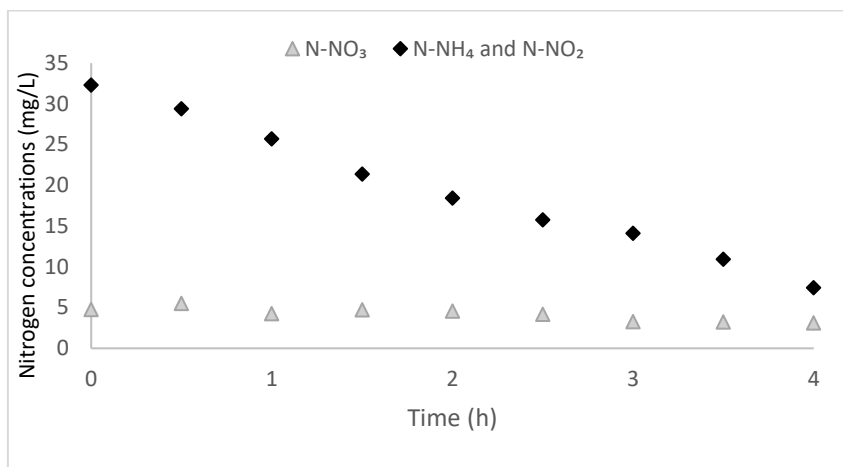

Figure S3. Batch test results during Stage II: (a) AUR, (b) NUR, (c) SAA.

(a) AUR

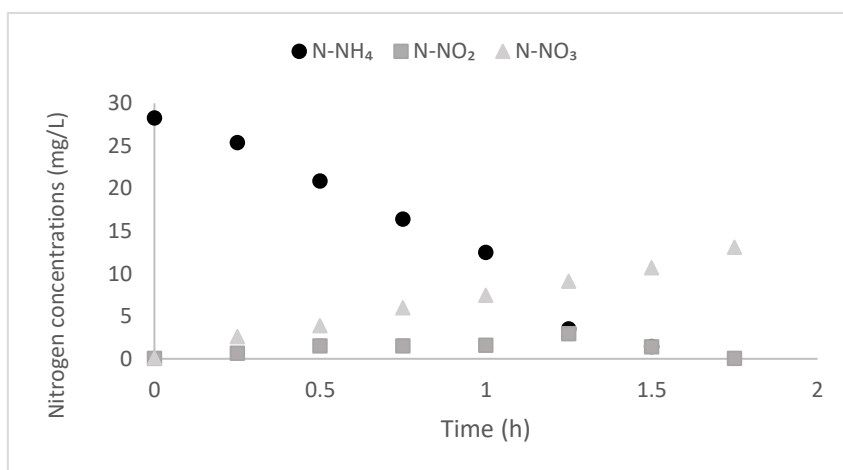

(b) NUR

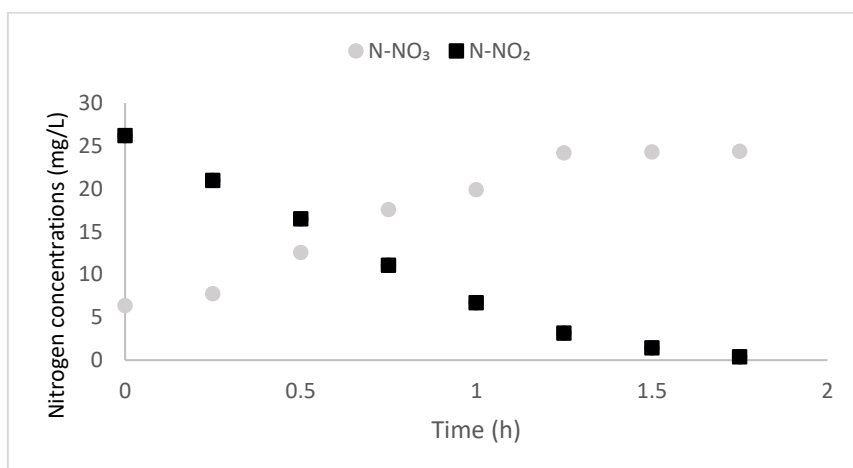

(c) SAA

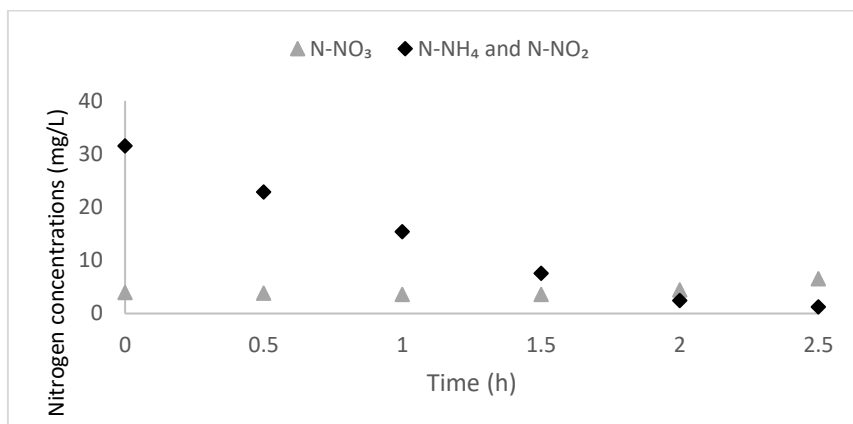

Figure S4. Batch test results during Stage III: (a) AUR, (b) NUR, (c) SAA.
